# Supplementary material for: Hollow carbon fiber sponges from crude catkins: an ultralow cost absorbent for oils and organic solvents
Source: Royal Society of Chemistry journal article supplement (doi:10.1039/c6ra08183e), 2016-01-01
Supplement: c6ra08183e1.pdf [file c6ra08183e1.pdf]

### Supporting Information

## Hollow carbon fiber sponges from crude catkins: An ultralow cost absorbent for oils and organic solvents

Linlin Zang,<sup>a,b</sup> Zhipeng Bu,<sup>a</sup> Liguó Sun,<sup>\*a</sup> Yanhong Zhang<sup>\*b</sup>

<sup>a</sup> Key Laboratory of Chemical Engineering Process & Technology for High-efficiency Conversion, College of Heilongjiang Province, Heilongjiang University, Harbin 150080, PR China

<sup>b</sup> School of Chemical Engineering and Materials, Heilongjiang University, Harbin 150080, PR China

**E-mail:** sunliguo1975@163.com; zhangyanhong1996@163.com

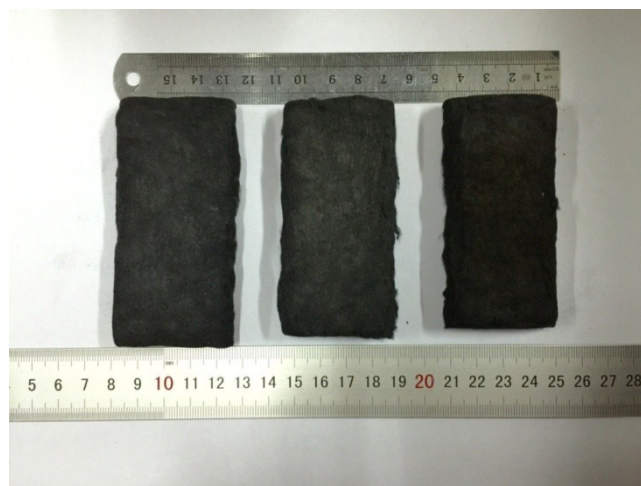

Fig. S1 Digital photo of HCFSs prepared under 500, 700 and 900 °C from left to right.

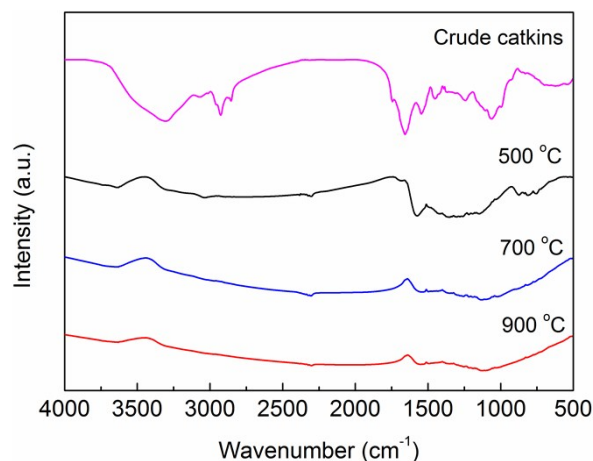

Fig. S2 FT-IR spectra of the crude catkins and the HCFSs at 800 °C.

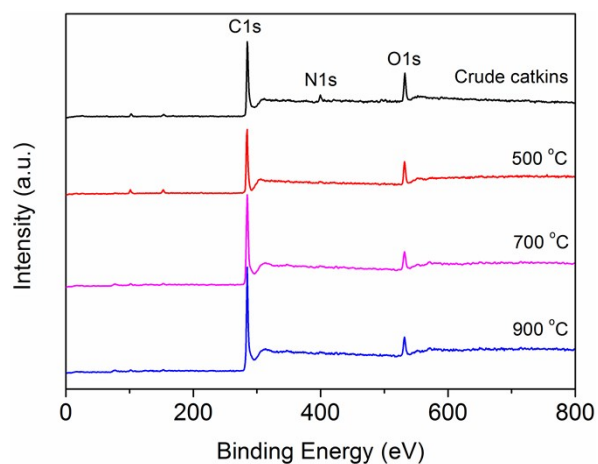

Fig. S3 XPS spectra of the crude catkins and the HCFSSs prepared by different pyrolysis temperatures.

Table S1 Atomic contents of C, N and O elements (at.%) in the crude catkins and the HCFSSs.

| Sample        | Elements |      |       |      |       |
|---------------|----------|------|-------|------|-------|
|               | C 1s     | N 1s | O 1s  | C/O  | C/N   |
| Crude catkins | 84.90    | 2.27 | 12.83 | 6.62 | 37.40 |
| HCFSSs 500 °C | 86.61    | 1.86 | 11.53 | 7.51 | 46.56 |
| HCFSSs 700 °C | 87.79    | 1.95 | 10.26 | 8.56 | 45.02 |
| HCFSSs 900 °C | 89.05    | 1.74 | 9.21  | 9.67 | 51.18 |

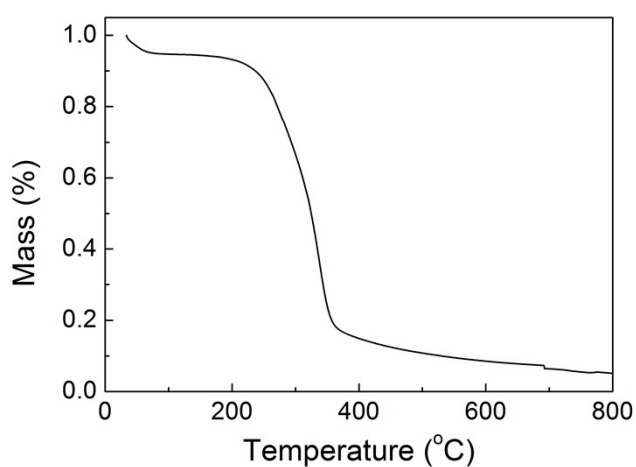

Fig. S4 TGA curve of the HCFSSs that was performed under air atmosphere and a heating rate of  $10\text{ }^{\circ}\text{C} \cdot \text{min}^{-1}$  from 30 to 800 °C.

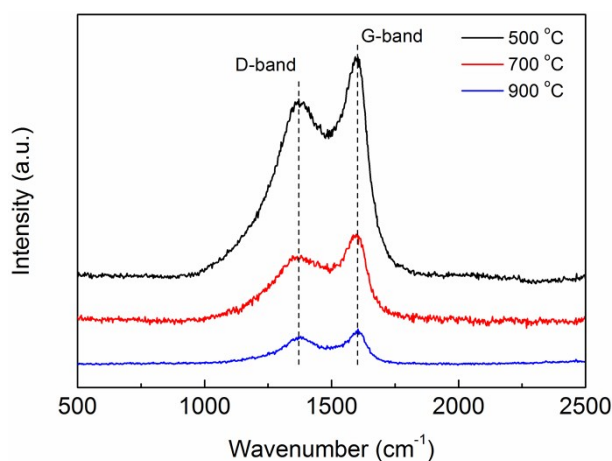

Fig. S5 Raman spectra of the HCFs prepared by pyrolysis at different temperatures.

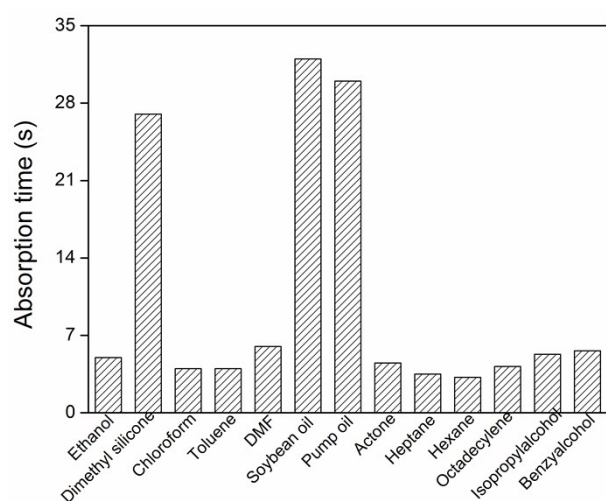

Fig. S6 Absorption time of HCFs-9 for various oils or solvents.

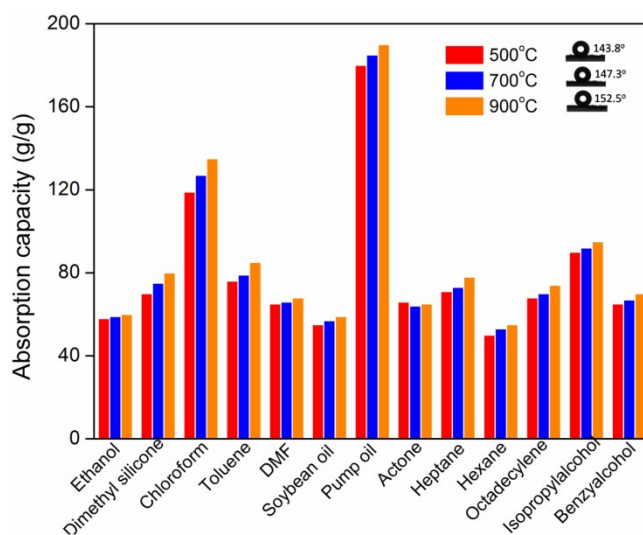

Fig. S7 Absorption capacity of HCFs-5, HCFs-7 and HCFs-9 for oil and organic solvents. Insert pictures were their contact angles when droplet water about  $5\mu\text{L}$  was placed on their surfaces, respectively.
